# Supplementary material for: Zinc Oxide Nanoparticle Enhances the Bioactive Compounds Content and the Anti-bacterial Activities in <em>Curcuma longa</em>
Source: Preprints.org preprint supplement (doi:10.20944/preprints202305.2198.v1), 2023-05-31
Supplement: Supplementary file 1 [file supplementary]

Table 1. Zone of inhibition (mm) exhibited by various test solutions on plates inoculated separately with *Staphylococcus aureus* (*S. aureus*), *Escherichia coli* ATCC8739 (*E. coli*), *Pseudomonas aeruginosa*, *Actinobacteria baumannii*, and *Bacillus sp.* Each of the mean measurements was obtained from the average of 18 replicate plates. The test solution positive control was 10 µg of imipenem. Five curcumin extract test solutions (5 mg/L) were prepared from ethanolic fruit extracts from three individual plants of each of the control and No discs containing the test solution negative control (DMSO: water, v:v: 1:1) produced an inhibition zone, in all 18 replicate plates.

| Test Solution              | Inhibition Zone (mm) |                    |                                 |                    |                               |
|----------------------------|----------------------|--------------------|---------------------------------|--------------------|-------------------------------|
|                            | <i>S. aureus</i>     | <i>E. coli</i>     | <i>Actinobacteria baumannii</i> | <i>Bacillus sp</i> | <i>Pseudomonas aeruginosa</i> |
| Curcumin extract (control) | 3±1 <sup>f</sup> *   | 6 ±2 <sup>b</sup>  | 4±2                             | 5±2                | 7 ±2 <sup>f</sup>             |
| Curcumin extract 5 mg/L    | 12±1 <sup>b</sup>    | 5 ±2 <sup>c</sup>  | 8±1                             | 10±3               | 13 ±1 <sup>b</sup>            |
| Curcumin extract 10 mg/L   | 11±1 <sup>c</sup>    | 0±0                | 13±2                            | 14±1               | 9±1 <sup>d</sup>              |
| Curcumin extract 20 mg/L   | 7±2 <sup>e</sup>     | 0±0                | 10±1                            | 9±2                | 8±1 <sup>e</sup>              |
| Curcumin extract 40 mg/L   | 9±1 <sup>d</sup>     | 0±0                | 8±3                             | 7±2                | 10±1 <sup>c</sup>             |
| Imipenem 10 µg             | 18 ±3 <sup>a</sup>   | 10 ±2 <sup>a</sup> | 18±2                            | 17±2               | 15 ±2 <sup>a</sup>            |

\* Means followed by the same letter within a column are not significantly different at 0.05 level of probability according to L.S.D. test.
